# Supplementary material for: Rapid-warming tolerance correlates with tolerance to slow warming but not growth at non-optimal temperatures in zebrafish
Source: Oxford University Press journal article supplement (doi:10.1242/jeb.229195), 2020-01-01
Supplement: jeb229195supp.pdf [file jeb229195supp.pdf]

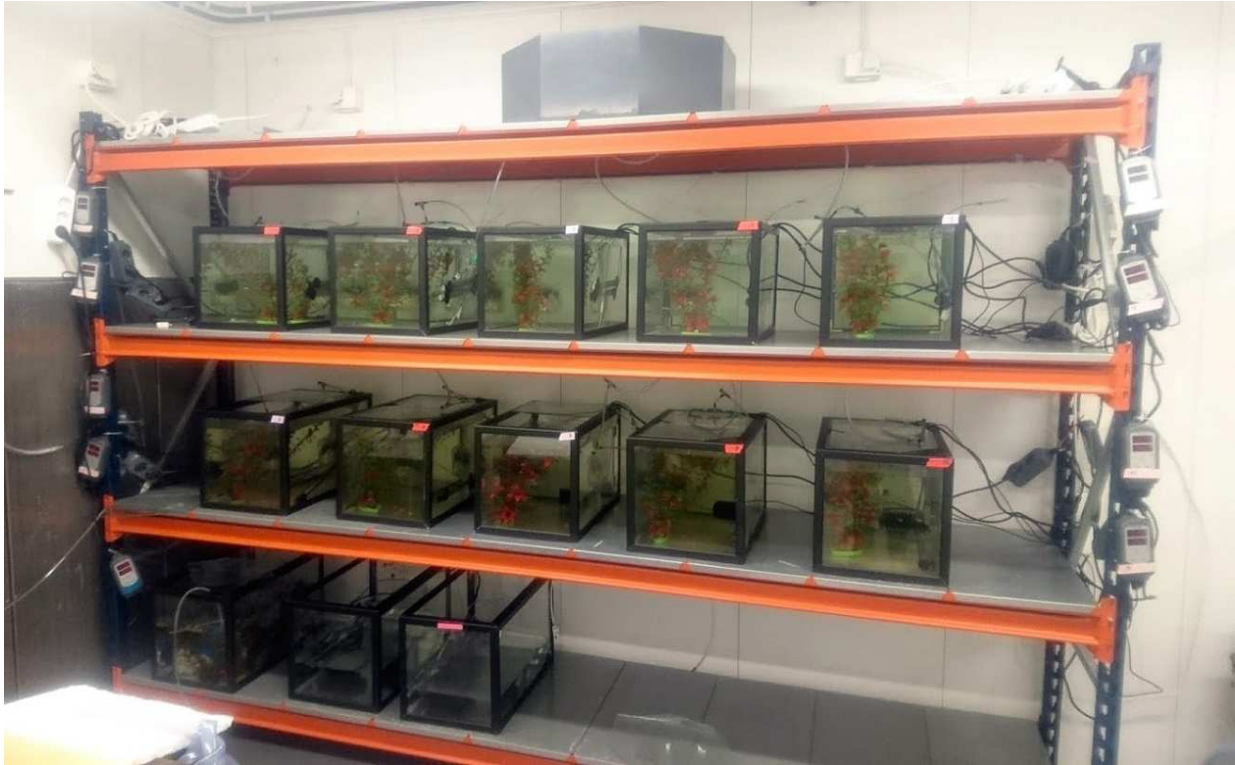

**Fig S1. Experimental setup.** The picture shows the tanks used in this experiment. Red labels indicates 34°C treatment and white label indicates 22°C treatment. The temperature in each tank is controlled with a thermostat (seen on the shelves columns) connected to one or two titanium heaters (seen on tank's left side). Each tank was equipped with one red and green ornamental plastic plant and two sponge biofilters for filtration, aeration and circulation. The 34°C tanks had an extra air stone installed to increase circulation over their heaters, resulting in a more even and stable temperature in their tanks.

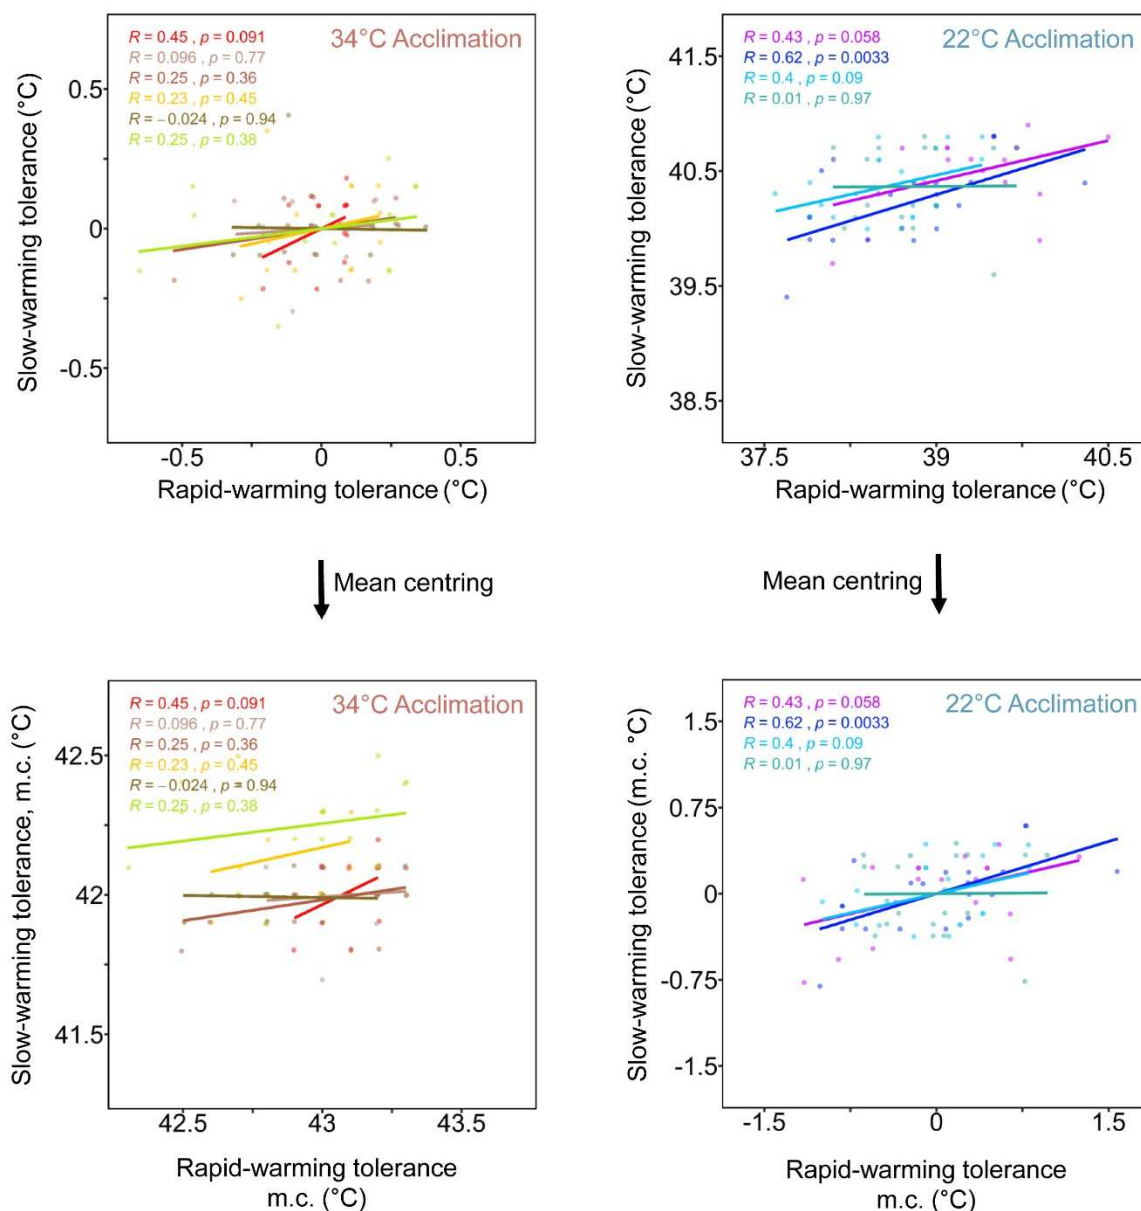

**Fig S2. Mean centring adjusting for tank effects.** Shows rapid-warming tolerance, measured as the temperature where loss of equilibrium (LOE) occurs at a warming rate of  $0.3^{\circ}\text{C min}^{-1}$  (also known as  $\text{CT}_{\text{max}}$ ; Critical thermal maximum) and slow-warming tolerance (LOE at a warming rate of  $0.025^{\circ}\text{C min}^{-1}$ ) for both acclimation treatments before and after mean centring (m.c.) of values. Mean centring redefines each value by subtracting the mean of its respective holding-tank from it, centring all tank-means on zero. Lines are fitted using least-square regression and are for illustrative purpose only.

**Table S1. Tank effects.** Results of analysis on linear models modelling either rapid-warming tolerance, measured as the temperature where loss of equilibrium (LOE) occurs at a warming rate of  $0.3^{\circ}\text{C min}^{-1}$  (also known as  $\text{CT}_{\text{max}}$ ; Critical thermal maximum); slow-warming tolerance (LOE at a warming rate of  $0.025^{\circ}\text{C min}^{-1}$ ) or growth as the response variable against holding tank as the predictor variable. \*Significant P-values below 0.05.

| Relationship                  | Accl temp ( $^{\circ}\text{C}$ ) | SSq   | $F_{\text{df}}$    | p         |
|-------------------------------|----------------------------------|-------|--------------------|-----------|
| Slow-warming tolerance ~ Tank | 22                               | 0.717 | $F_{3,75} = 2.247$ | 0.090     |
|                               | 34                               | 0.774 | $F_{5,76} = 8.915$ | 1.07e-06* |
| Fast-warming tolerance ~ Tank | 22                               | 5.105 | $F_{3,75} = 5.071$ | 0.003*    |
|                               | 34                               | 0.974 | $F_{5,76} = 4.548$ | 0.001*    |
| Growth ~ Tank                 | 22                               | 13060 | $F_{3,75} = 1.313$ | 0.276     |
|                               | 34                               | 6003  | $F_{5,76} = 1.385$ | 0.239     |

**Table S2. Spearman correlations.** The table includes an alternative analysis of the correlations in table S1, using Spearman's rank correlation coefficient ( $\rho$ ) and corresponding p-values for correlations between all combinations of growth; rapid-warming tolerance, measured as the temperature where loss of equilibrium (LOE) occurs at a warming rate of  $0.3^{\circ}\text{C min}^{-1}$  (also known as  $\text{CT}_{\text{max}}$ ; Critical thermal maximum) and slow-warming tolerance (LOE at a warming rate of  $0.025^{\circ}\text{C min}^{-1}$ ) at two acclimation temperatures (22 and  $34^{\circ}\text{C}$ ). To correct for tank-effects, mean-centring (m.c.) was done by redefining each value as its deviance from tank mean. Correlations were tested using both raw values and mean-centred values. \*Significant P-values below 0.05; †near-significant P-values below 0.1. This alternative analysis gives the same main results as the first analysis using Pearson's correlation coefficient, but removes the near-significant ( $p < 0.1$ ) relationship between growth and slow-warming tolerance in the  $22^{\circ}\text{C}$  treatment.

| Relationship                                            | Acclimated temp ( $^{\circ}\text{C}$ ) | Raw values    |         | Mean centred (m.c.) |        |
|---------------------------------------------------------|----------------------------------------|---------------|---------|---------------------|--------|
|                                                         |                                        | Correlation I |         | Correlation II      |        |
|                                                         |                                        | $\rho$        | p       | $\rho$              | p      |
| <i>Growth - slow-warming tolerance</i>                  | 22                                     | 0.169         | 0.136   | 0.145               | 0.201  |
|                                                         | 34                                     | 0.031         | 0.783   | 0.006               | 0.960  |
| <i>Growth - rapid-warming tolerance</i>                 | 22                                     | 0.109         | 0.338   | 0.085               | 0.454  |
|                                                         | 34                                     | -0.015        | 0.892   | 0.017               | 0.877  |
| <i>Rapid-warming tolerance - slow-warming tolerance</i> | 22                                     | 0.445         | 0.0004* | 0.366               | 0.001* |
|                                                         | 34                                     | 0.139         | 0.209   | 0.200               | 0.070† |
